# Supplementary material
Source: publisher figshare collection journal article supplement (https://asha.figshare.com/ndownloader/files/36250881)
Supplement: Supplementary file 1 [file 36250881]

**Supplemental Material S1.** *t* test results comparing the performance of adults who stutter in the first half and second half of the discrimination experiments.

| <b>Condition</b> | <b>Mean <i>d'</i>:<br/>First half</b> | <b>Mean <i>d'</i>:<br/>Second half</b> | <b><i>t</i></b> | <b><i>p</i></b> |
|------------------|---------------------------------------|----------------------------------------|-----------------|-----------------|
| VOT              | 2.07                                  | 1.91                                   | 0.508           | .613            |
| Vowel            | 3.26                                  | 3.61                                   | -1.12           | .267            |
| Lexical tone     | 2.79                                  | 2.71                                   | 0.228           | .820            |
| Nonspeech        | 2.71                                  | 2.92                                   | -0.582          | .563            |

*Note.* VOT = voice onset time.
